# Supplementary material
Source: publisher figshare collection journal article supplement (https://tandf.figshare.com/ndownloader/files/15542798)
Supplement: Supplementary file 1 [file 15542798]

Supplementary Material

Cytotoxicity of safrole in HepaRG Cells: Studies on the Role of CYP1A2 - mediated ortho-quinone Metabolic Activation

**Supplementary Table 1** Temporal proﬁle data in the effects of Safrole on intracellular level of ROS, GSH and GSSG,

| Time | ROS | | GSH (umol/g) | | GSSG (umol/g) | |
| --- | --- | --- | --- | --- | --- | --- |
| Average | SD | Average | SD | Average | SD |
| 0 | 220.4 | 2.2 | 73.0 | 1.2 | 4.9 | 0.2 |
| 1 | 516.6 | 9.0 | 66.0 | 0.5 | 5.3 | 0.1 |
| 3 | 805.8 | 7.1 | 58.9 | 0.3 | 7.3 | 0.1 |
| 6 | 1272.44 | 52.9 | 50.3 | 0.9 | 7.7 | 0.3 |
| 12 | 2015.1 | 79.3 | 41.8 | 1.5 | 8.3 | 0.1 |
| 24 | 2368.5 | 52.0 | 35.8 | 0.6 | 8.2 | 0.1 |
